# Supplementary material for: Long-term functional outcomes improved with deep brain stimulation in patients with disorders of consciousness
Source: HighWire-hosted journal article supplement (doi:10.1136/svn-2022-001998), 2023-03-07
Supplement: svn-2022-001998supp001_data_supplement.pdf [file svn-2022-001998supp001_data_supplement.pdf]

**Supplementary online content****Supplementary Tables**

**Table S1.** Baseline characteristics of the study population

**Table S2.** Demographics of DoCs patients received DBS treatment

**Table S3.** Characteristics of DBS patients according to 1 year outcome

**Table S4.** Emergence from unconsciousness at 1 year in DBS patients with different diagnosis

**Supplementary Figure**

**Fig S1.** Flowchart of the study participants.

**Fig S2.** Hosmer–Lemeshow goodness-of-fit test of the nomogram

Table S1. Baseline characteristics of the study population

| Variable                   | All patients<br>(N = 365) | DBS group<br>(N = 37) | Control group<br>(N = 328) | P<br>value |
|----------------------------|---------------------------|-----------------------|----------------------------|------------|
| Age, y, median (IQR)       | 49.0 (35.0-58.0)          | 45.0 (35.0-58.0)      | 49.0 (35.0-58.0)           | 0.431      |
| Sex (%)                    |                           |                       |                            | 0.349      |
| Male                       | 253 (69.3)                | 23 (62.2)             | 230 (70.1)                 |            |
| Female                     | 112 (30.7)                | 14 (37.8)             | 98 (29.9)                  |            |
| Pathogeny (%)              |                           |                       |                            | 0.080      |
| Anoxia                     | 65 (17.8)                 | 10 (27.0)             | 55 (16.8)                  |            |
| Stroke                     | 164 (44.9)                | 19 (51.4)             | 145 (44.2)                 |            |
| Trauma                     | 136 (37.3)                | 8 (21.6)              | 128 (39.0)                 |            |
| Duration at admission (%)  |                           |                       |                            | <0.00<br>1 |
| 3-5 months                 | 65 (17.8)                 | 25 (67.6)             | 40 (12.2)                  |            |
| 6-11 months                | 57 (15.6)                 | 8 (21.6)              | 49 (14.9)                  |            |
| ≥12 months                 | 243 (66.6)                | 4 (10.8)              | 239 (72.9)                 |            |
| State of consciousness (%) |                           |                       |                            | 0.856      |
| MCS                        | 123 (33.7)                | 13 (35.1)             | 110 (33.5)                 |            |
| VS/UWS                     | 242 (66.3)                | 24 (64.9)             | 218 (66.5)                 |            |

Abbreviations: DBS, deep brain stimulation; MCS, minimally consciousness state; VS/UWS, vegetative state/unresponsive wakefulness syndrome.

\*P < 0.05, significant difference

Table S2. Demographics of DoCs patients received DBS treatment

| Variables                   | State of consciousness |                    | P value |
|-----------------------------|------------------------|--------------------|---------|
|                             | MCS (N = 13)           | VS/UWS (N = 24)    |         |
| Age, y, median (IQR)        | 35.0 (26.0 - 48.5)     | 49.5 (41.0 - 59.8) | 0.002   |
| Sex (%)                     |                        |                    | 0.288   |
| Male                        | 10 (76.9)              | 13 (54.2)          |         |
| Female                      | 3 (23.1)               | 11 (45.8)          |         |
| Pathogeny (%)               |                        |                    | 0.025   |
| Anoxia                      | 3 (23.1)               | 7 (29.2)           |         |
| Stroke                      | 4 (30.8)               | 15 (62.5)          |         |
| Trauma                      | 6 (46.2)               | 2 (8.3)            |         |
| Duration at admission (%)   |                        |                    | 0.002   |
| 3-5                         | 4 (30.8)               | 21 (87.5)          |         |
| 6-11                        | 6 (46.2)               | 2 (8.3)            |         |
| ≥12                         | 3 (23.1)               | 1 (4.2)            |         |
| Recommendation criteria (%) |                        |                    | 0.098   |
| Weakly recommended          | 5 (38.5)               | 16 (66.7)          |         |
| Highly recommended          | 8 (61.5)               | 8 (33.3)           |         |

DoCs, disorders of consciousness; DBS, deep brain stimulation; MCS, minimally consciousness state; VS/UWS, vegetative state/unresponsive wakefulness state

\*P < 0.05, significant difference

Table S3. Characteristics of DBS patients according to 1 year outcome

| Variables (%)               | Therapeutic effect |                             | P value |
|-----------------------------|--------------------|-----------------------------|---------|
|                             | Positive (N = 12)  | Unchanged or death (N = 25) |         |
| Age, y, mean $\pm$ SD       | 33.9 $\pm$ 12.9    | 50.3 $\pm$ 10.3             | <0.001  |
| Sex (%)                     |                    |                             | 0.265   |
| Male                        | 9 (75.0)           | 14 (56.0)                   |         |
| Female                      | 3 (25.0)           | 11 (44.0)                   |         |
| State of consciousness (%)  |                    |                             | <0.001  |
| MCS                         | 10 (83.3)          | 3 (12.0)                    |         |
| VS/UWS                      | 2 (16.7)           | 22 (88.0)                   |         |
| Pathogeny (%)               |                    |                             | 0.010   |
| Anoxia                      | 1 (8.3)            | 9 (36.0)                    |         |
| Stroke                      | 5 (41.7)           | 14 (56.0)                   |         |
| Trauma                      | 6 (50.0)           | 2 (8.0)                     |         |
| Duration (%)                |                    |                             | 0.286   |
| 3-5                         | 6 (50.0)           | 19 (76.0)                   |         |
| 6-11                        | 4 (33.3)           | 4 (16.0)                    |         |
| $\geq$ 12                   | 2 (16.7)           | 2 (8.0)                     |         |
| Recommendation criteria (%) |                    |                             | 0.012   |
| Weakly recommended          | 3 (25.0)           | 18 (72.0)                   |         |
| Highly recommended          | 9 (75.0)           | 7 (28.0)                    |         |

DBS, deep brain stimulation; MCS, minimally consciousness state; VS/UWS, vegetative state/unresponsive wakefulness state.

\*P < 0.05, significant difference

Table S4. Emergence from unconsciousness at 1 year in DBS patients with different diagnosis

| Diagnosis                                 | MCS (N = 13) | VS/UWS (N = 24) | X <sup>2</sup> | P value |
|-------------------------------------------|--------------|-----------------|----------------|---------|
| <b>GOS (%)</b>                            |              |                 |                |         |
| 1                                         | 0 (0.0)      | 1 (4.2)         | 20.8           | <0.001  |
| 2                                         | 2 (15.4)     | 20 (83.3)       |                |         |
| 3                                         | 5 (38.5)     | 3 (12.5)        |                |         |
| 4                                         | 3 (23.1)     | 0 (0.0)         |                |         |
| 5                                         | 3 (23.1)     | 0 (0.0)         |                |         |
| <b>Emergence from unconsciousness (%)</b> |              |                 | 15.7           | <0.001  |
| Emergence                                 | 11 (84.6)    | 3 (12.5)        | 1              |         |
| Nonemergence                              | 2 (15.4)     | 21 (87.5)       |                |         |

DBS, deep brain stimulation; MCS, minimally consciousness state; VS/UWS, vegetative state/unresponsive wakefulness state; GOS, glasgow outcome scale..

\*P < 0.05, significant different.

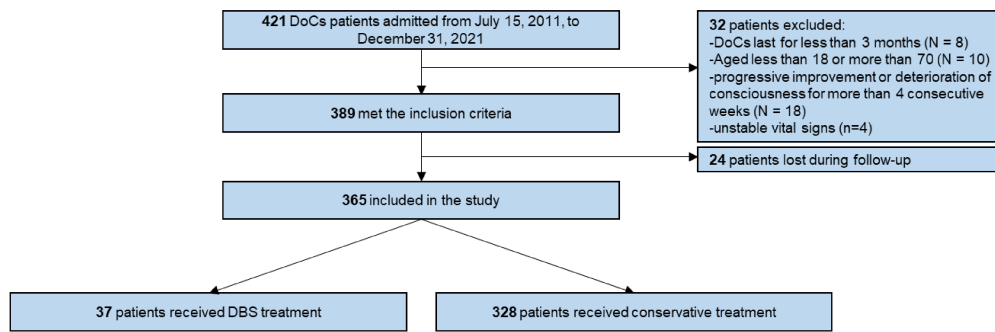

**Fig S1.** Flowchart of the study participants. DoCs, disorders of consciousness; DBS, deep brain stimulation.

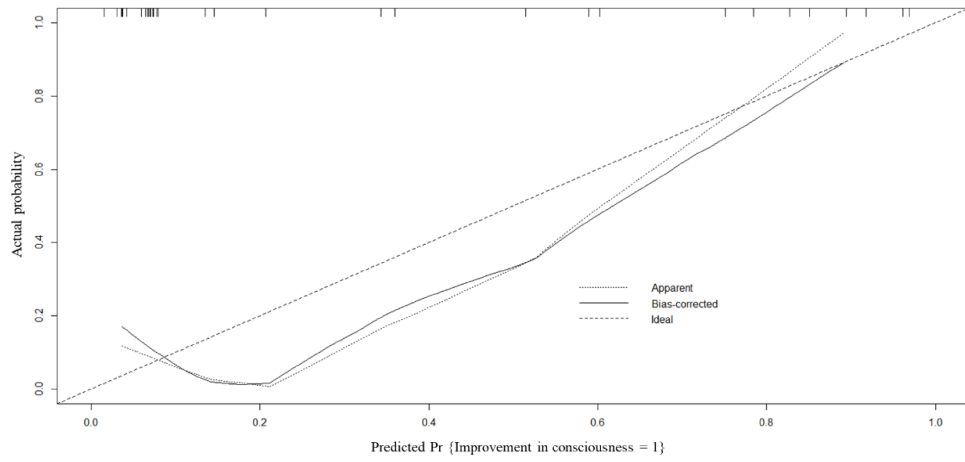

**Fig S2.** Hosmer–Lemeshow goodness-of-fit test of the nomogram
